# Supplementary material for: Characterizing Archaeological Rhyolites in the Nenana Valley, Interior Alaska
Source: MDPI journal article supplement (doi:10.3390/min13091146), 2023-08-30
Supplement: s1 [file s1]

## Supplementary Tables

**Table S1.** Raw material survey results of samples collected from select alluvial locations.

| Select Survey Locations                | Basalt |     | Rhyolite |    | Andesite |     | Chalcedony |    | Chert |    | Non-Knappable Materials |      | Total |      |
|----------------------------------------|--------|-----|----------|----|----------|-----|------------|----|-------|----|-------------------------|------|-------|------|
|                                        | N      | %   | N        | %  | N        | %   | N          | %  | N     | %  | N                       | %    | N     | %    |
| <b>Savage and Teklanika Confluence</b> | 20     | 16% | 1        | 1% | 0        | 0%  | 0          | 0% | 0     | 0% | 103                     | 83%  | 124   | 100% |
| First Creek                            | 15     | 12% | 0        | 0% | 21       | 17% | 0          | 0% | 1     | 1% | 84                      | 69%  | 121   | 100% |
| Dry Creek East                         | 67     | 36% | 0        | 0% | 0        | 0%  | 0          | 0% | 0     | 0% | 119                     | 64%  | 186   | 100% |
| Dry Creek Pt. 2                        | 5      | 4%  | 0        | 0% | 0        | 0%  | 0          | 0% | 2     | 2% | 107                     | 94%  | 114   | 100% |
| Dry Creek Pt. 4                        | 15     | 3%  | 0        | 0% | 0        | 0%  | 0          | 0% | 3     | 1% | 473                     | 96%  | 491   | 100% |
| Cottonwood Creek                       | 8      | 5%  | 0        | 0% | 0        | 0%  | 1          | 1% | 0     | 0% | 124                     | 94%  | 132   | 100% |
| Tatlanika Creek                        | 1      | 0%  | 0        | 0% | 0        | 0%  | 0          | 0% | 3     | 1% | 438                     | 99%  | 442   | 100% |
| California Creek                       | 1      | 0%  | 1        | 0% | 0        | 0%  | 0          | 0% | 21    | 9% | 204                     | 90%  | 231   | 100% |
| Savage River                           | 3      | 2%  | 0        | 0% | 0        | 0%  | 0          | 0% | 1     | 1% | 192                     | 98%  | 196   | 100% |
| Jenny Creek                            | 0      | 0%  | 0        | 0% | 0        | 0%  | 0          | 0% | 0     | 0% | 223                     | 100% | 223   | 100% |
| DENA 1                                 | 0      | 0%  | 0        | 0% | 0        | 0%  | 0          | 0% | 0     | 0% | 166                     | 100% | 166   | 100% |
| DENA 2                                 | 0      | 0%  | 0        | 0% | 0        | 0%  | 0          | 0% | 0     | 0% | 105                     | 100% | 105   | 100% |
| Riley Creek                            | 1      | 1%  | 0        | 0% | 0        | 0%  | 0          | 0% | 0     | 0% | 136                     | 99%  | 137   | 100% |
| Upper Moose Creek                      | 0      | 0%  | 0        | 0% | 0        | 0%  | 0          | 0% | 2     | 1% | 190                     | 99%  | 192   | 100% |
| <b>Cindy and James Creek*</b>          | 6      | 5%  | 0        | 0% | 0        | 0%  | 0          | 0% | 8     | 7% | 100                     | 88%  | 114   | 100% |
| Teklanika River                        | 13     | 7%  | 10       | 6% | 0        | 0%  | 0          | 0% | 9     | 5% | 142                     | 82%  | 174   | 100% |
| Toklat River                           | 22     | 13% | 0        | 0% | 0        | 0%  | 0          | 0% | 0     | 0% | 145                     | 87%  | 167   | 100% |
| Rock Creek                             | 5      | 3%  | 0        | 0% | 0        | 0%  | 0          | 0% | 0     | 0% | 178                     | 97%  | 183   | 100% |
| <b>Little Panguingue Creek</b>         | 9      | 5%  | 0        | 0% | 0        | 0%  | 0          | 0% | 2     | 1% | 183                     | 94%  | 194   | 100% |
| Carlo Creek                            | 56     | 15% | 0        | 0% | 0        | 0%  | 0          | 0% | 3     | 1% | 310                     | 84%  | 369   | 100% |
| Panguingue Creek                       | 15     | 4%  | 0        | 0% | 0        | 0%  | 0          | 0% | 13    | 4% | 324                     | 92%  | 352   | 100% |
| Slate Creek                            | 7      | 1%  | 0        | 0% | 0        | 0%  | 0          | 0% | 7     | 1% | 475                     | 97%  | 489   | 100% |
| NW Dry Creek                           | 4      | 3%  | 0        | 0% | 0        | 0%  | 0          | 0% | 1     | 1% | 149                     | 97%  | 154   | 100% |
| Fish Creek                             | 0      | 0%  | 0        | 0% | 0        | 0%  | 0          | 0% | 3     | 1% | 401                     | 99%  | 404   | 100% |
| Nenana River 1                         | 1      | 0%  | 0        | 0% | 0        | 0%  | 0          | 0% | 8     | 2% | 362                     | 98%  | 371   | 100% |
| Nenana River 2                         | 41     | 13% | 0        | 0% | 0        | 0%  | 0          | 0% | 4     | 1% | 267                     | 86%  | 315   | 100% |
| Nenana River 3                         | 33     | 23% | 0        | 0% | 0        | 0%  | 0          | 0% | 0     | 0% | 108                     | 77%  | 141   | 100% |
| Nenana River 4                         | 54     | 33% | 0        | 0% | 0        | 0%  | 0          | 0% | 0     | 0% | 109                     | 67%  | 163   | 100% |
| Nenana River 5                         | 87     | 20% | 0        | 0% | 0        | 0%  | 0          | 0% | 2     | 0% | 348                     | 80%  | 437   | 100% |
| Chicken Creek                          | 6      | 1%  | 0        | 0% | 0        | 0%  | 0          | 0% | 8     | 2% | 423                     | 97%  | 437   | 100% |
| Windy Creek                            | 271    | 84% | 0        | 0% | 0        | 0%  | 0          | 0% | 0     | 0% | 51                      | 16%  | 322   | 100% |
| <b>Suntrana at Healy Creek</b>         | 0      | 0%  | 0        | 0% | 0        | 0%  | 0          | 0% | 0     | 0% | 508                     | 100% | 508   | 100% |
| Walker Creek                           | 23     | 15% | 0        | 0% | 0        | 0%  | 0          | 0% | 2     | 1% | 131                     | 84%  | 156   | 100% |

\*Cindy and James Creek is the informal name for the creek that flows from Walker Dome to the Nenana River, next to the Walker Road site.

**Table S2.** Eigenvalue, percentage of variance, and element score for each principal component calculated from the variance-covariance matrix of concentration data (log-10 ppm) for rhyolite outcrop samples.

| Principal Component | Eigenvalue | % Variance | Cumulative % Variance |       |       |
|---------------------|------------|------------|-----------------------|-------|-------|
| 1                   | 0.4372     | 55.93      | 55.93                 |       |       |
| 2                   | 0.2759     | 35.30      | 91.23                 |       |       |
| 3                   | 0.0341     | 4.36       | 95.59                 |       |       |
| 4                   | 0.0227     | 2.90       | 98.49                 |       |       |
| 5                   | 0.0118     | 1.51       | 100.00                |       |       |
| Element             | PC 1       | PC 2       | PC3                   | PC4   | PC5   |
| Rb                  | 0.60       | 0.35       | -0.69                 | -0.19 | 0.12  |
| Sr                  | 0.52       | -0.83      | 0.09                  | -0.17 | 0.10  |
| Y                   | 0.30       | 0.37       | 0.61                  | -0.63 | -0.11 |
| Zr                  | 0.18       | -0.05      | -0.07                 | 0.16  | -0.97 |
| Nb                  | 0.50       | 0.23       | 0.38                  | 0.72  | 0.18  |

**Table S3.** Eigenvalue, percentage of variance, and element score for each principal component calculated from the variance-covariance matrix of concentration data (log-10 ppm) for outcrop and alluvial samples.

| Principal Component | Eigenvalue | % Variance | Cumulative % Variance |       |       |
|---------------------|------------|------------|-----------------------|-------|-------|
| 1                   | 0.4098     | 51.23      | 51.23                 |       |       |
| 2                   | 0.2617     | 32.71      | 83.94                 |       |       |
| 3                   | 0.0843     | 10.53      | 94.47                 |       |       |
| 4                   | 0.0263     | 3.29       | 97.76                 |       |       |
| 5                   | 0.0719     | 2.24       | 100.00                |       |       |
| Element             | PC 1       | PC 2       | PC3                   | PC4   | PC5   |
| Rb                  | 0.54       | 0.02       | -0.69                 | -0.45 | -0.18 |
| Sr                  | 0.23       | -0.95      | 0.07                  | 0.17  | -0.11 |
| Y                   | 0.43       | 0.29       | 0.09                  | 0.62  | -0.58 |
| Zr                  | 0.37       | 0.07       | 0.71                  | -0.57 | -0.19 |
| Nb                  | 0.58       | 0.10       | 0.09                  | 0.25  | 0.76  |

**Table S4.** Eigenvalue, percentage of variance, and element score for each principal component calculated from the variance-covariance matrix of concentration data (log-10 ppm) for rhyolite artifact samples.

| Principal Component | Eigenvalue | % Variance | Cumulative % Variance |       |       |
|---------------------|------------|------------|-----------------------|-------|-------|
| 1                   | 0.2663     | 59.09      | 59.09                 |       |       |
| 2                   | 0.1311     | 29.10      | 88.19                 |       |       |
| 3                   | 0.0292     | 6.50       | 94.69                 |       |       |
| 4                   | 0.0157     | 3.50       | 98.19                 |       |       |
| 5                   | 0.0081     | 1.81       | 100.00                |       |       |
| Element             | PC 1       | PC 2       | PC3                   | PC4   | PC5   |
| Rb                  | 0.30       | 0.41       | -0.07                 | -0.83 | 0.22  |
| Sr                  | -0.93      | 0.29       | 0.07                  | -0.20 | -0.01 |
| Y                   | 0.19       | 0.57       | 0.39                  | 0.14  | -0.69 |
| Zr                  | -0.01      | 0.26       | -0.92                 | 0.14  | -0.27 |
| Nb                  | 0.07       | 0.59       | 0.05                  | 0.49  | 0.64  |

**Table S5.** Eigenvalue, percentage of variance, and element score for each principal component calculated from the variance-covariance matrix of concentration data (log-10 ppm) for rhyolite artifact and alluvial samples.

| Principal Component | Eigenvalue | % Variance | Cumulative % Variance |  |  |
|---------------------|------------|------------|-----------------------|--|--|
| 1                   | 0.2587     | 80.28      | 80.28                 |  |  |
| 2                   | 0.0347     | 10.79      | 91.07                 |  |  |
| 3                   | 0.0147     | 4.56       | 95.63                 |  |  |
| 4                   | 0.0104     | 3.23       | 98.86                 |  |  |
| 5                   | 0.0036     | 1.14       | 100.00                |  |  |

  

| Element | PC 1  | PC 2 | PC3   | PC4   | PC5   |
|---------|-------|------|-------|-------|-------|
| Rb      | 0.28  | 0.27 | 0.33  | 0.85  | -0.12 |
| Sr      | -0.93 | 0.26 | 0.19  | 0.16  | 0.03  |
| Y       | 0.20  | 0.50 | 0.42  | -0.29 | 0.67  |
| Zr      | 0.01  | 0.49 | -0.82 | 0.20  | 0.23  |
| Nb      | 0.10  | 0.61 | 0.08  | -0.36 | -0.70 |

**Table S6.** Eigenvalues, percentage of variance, and element scores for each principal component calculated from the variance-covariance matrix of concentration data (log-10 ppm) for rhyolite artifact and outcrop samples.

| Principal Component | Eigenvalue | % Variance | Cumulative % Variance |  |  |
|---------------------|------------|------------|-----------------------|--|--|
| 1                   | 0.2664     | 59.70      | 59.70                 |  |  |
| 2                   | 0.1358     | 30.44      | 90.14                 |  |  |
| 3                   | 0.0236     | 5.29       | 95.43                 |  |  |
| 4                   | 0.0127     | 2.85       | 98.28                 |  |  |
| 5                   | 0.0077     | 1.72       | 100.00                |  |  |

  

| Element | PC 1  | PC 2 | PC3   | PC4   | PC5   |
|---------|-------|------|-------|-------|-------|
| Rb      | 0.27  | 0.55 | 0.32  | 0.69  | 0.20  |
| Sr      | -0.95 | 0.23 | 0.19  | 0.08  | 0.11  |
| Y       | 0.15  | 0.46 | 0.12  | -0.65 | 0.58  |
| Zr      | -0.07 | 0.39 | -0.91 | 0.13  | 0.04  |
| Nb      | 0.04  | 0.53 | 0.15  | -0.29 | -0.78 |

**Table S7.** Group probabilities of artifact membership in each rhyolite outcrop group based on Mahalanobis distance calculations.

| Artifact | Rhyolite Outcrop Group Membership Probabilities |                |                     |
|----------|-------------------------------------------------|----------------|---------------------|
|          | <i>Ferry 3</i>                                  | <i>Ferry 5</i> | <i>Triple Lakes</i> |
| MC       | 0.006                                           | 32.306         | 68.241              |
| OR2      | 0.001                                           | 0.373          | 31.569              |
